# Supplementary material for: Molecular Scoring of Hepatocellular Carcinoma for Predicting Metastatic Recurrence and Requirements of Systemic Chemotherapy
Source: MDPI journal article supplement (doi:10.3390/cancers10100367), 2018-09-29
Supplement: s1 [file s1]

# Supplementary Materials: Molecular Scoring of Hepatocellular Carcinoma for Predicting Metastatic Recurrence and Requirements of Systemic Chemotherapy

Naoshi Nishida, Takafumi Nishimura, Toshimi Kaido, Kosuke Minaga, Kentaro Yamao, Ken Kamata, Mamoru Takenaka, Hiroshi Ida, Satoru Hagiwara, Yasunori Minami, Toshiharu Sakurai, Tomohiro Watanabe and Masatoshi Kudo

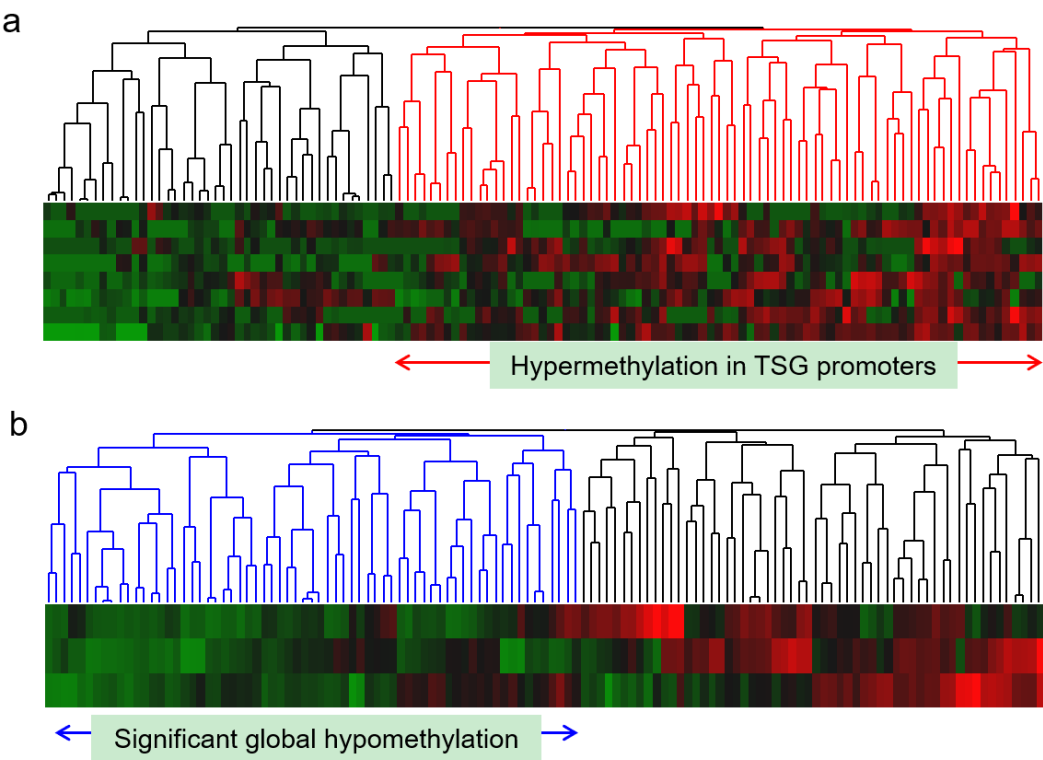

**Figure S1.** Classifications of HCCs based on methylation status of 8 tumor suppressor gene (TSG) promoters and 3 kind of repetitive DNA sequences (rDNAs). **(a)** HCCs with hypermethylation in the promoters of TSGs were determined using hierarchical clustering analysis. **(b)** Hypomethylation at rDNAs, which were the representative of global hypomethylation, was also determined as carrying significant hypomethylation.

**Table S1.** Mutations detected in HCCs from hepatic resection.

| Sample ID | CNTTB1           | TP53               | TERT Promoter |
|-----------|------------------|--------------------|---------------|
| 1T        | none             | none               | (-146) G→A    |
| 2T        | none             | none               | (-124) G→A    |
| 3T        | none             | none               | (-124) G→A    |
| 4T        | none             | none               | none          |
| 5T        | none             | none               | (-124) G→A    |
| 6T        | codon 45 TCT→CCT | codon 151 CCC→GCC  | (-124) G→A    |
| 7T        | none             | none               | (-124) G→A    |
| 8T        | codon 32 GAC→TAC | none               | (-124) G→A    |
| 9T        | codon 45 TCT→CCT | none               | (-124) G→A    |
| 10T       | codon 36 CAT→CGT | none               | none          |
| 11T       | none             | none               | none          |
| 12T       | none             | intron 7 AGgt→AGgg | (-124) G→A    |
| 13T       | codon 33 TCT→TGT | none               | none          |

|     |                  |                                |            |
|-----|------------------|--------------------------------|------------|
| 14T | none             | none                           | (-124) G→A |
| 15T | codon 36 CAT→CCT | none                           | (-124) G→A |
| 16T | none             | none                           | none       |
| 17T | none             | codon 285 GAG→TAG              | (-124) G→A |
| 18T | none             | none                           | (-124) G→A |
| 19T | none             | none                           | (-124) G→A |
| 20T | codon 41 ACC→GCC | codon 141 TGC→TAC              | (-124) G→A |
| 21T | none             | codon 130 CTC→TTC              | none       |
| 22T | codon 41 ACC→GCC | none                           | (-124) G→A |
| 23T | codon 45 TCT→TTT | none                           | (-124) G→A |
| 24T | none             | none                           | (-124) G→A |
| 25T | none             | none                           | (-124) G→A |
| 26T | none             | intron 6 AGgt→AGgg             | (-124) G→A |
| 27T | none             | codon 208 GAC→GCC              | (-124) G→A |
| 28T | none             | none                           | (-124) G→A |
| 29T | none             | none                           | (-124) G→A |
| 30T | none             | codon 247 CGG→CAG              | none       |
| 31T | none             | codon 278 CCT→TCT              | (-124) G→A |
| 32T | none             | none                           | (-124) G→A |
| 33T | none             | none                           | (-124) G→A |
| 34T | none             | none                           | none       |
| 35T | none             | none                           | (-124) G→A |
| 36T | codon 45 TCT→CCT | none                           | (-124) G→A |
| 37T | none             | codon 147 del (1bp)            | none       |
| 38T | none             | none                           | none       |
| 39T | codon33 TCT→CCT  | none                           | (-124) G→A |
| 40T | none             | none                           | (-124) G→A |
| 41T | none             | none                           | (-124) G→A |
| 42T | codon37 TCT→TGT  | codon 193 CAT→TAT              | (-124) G→A |
| 43T | none             | none                           | (-124) G→A |
| 44T | none             | none                           | (-124) G→A |
| 45T | none             | none                           | none       |
| 46T | none             | codon 161 GCC→TCC              | (-146) G→A |
| 47T | codon33 TCT→TTT  | none                           | (-124) G→A |
| 48T | none             | none                           | none       |
| 49T | none             | none                           | none       |
| 50T | codon44 CCT→GCT  | codon 177 CCC→CGC              | (-124) G→A |
| 51T | none             | codon 132 AAG→AAT              | (-124) G→A |
| 52T | none             | none                           | (-124) G→A |
| 53T | none             | none                           | (-124) G→A |
| 54T | codon32 GAC→AAC  | none                           | (-124) G→A |
| 55T | none             | intron 5 agGT→atGT             | (-124) G→A |
| 56T | none             | none                           | (-124) G→A |
| 57T | none             | none                           | none       |
| 58T | codon 36 CAT→CCT | codon 215 AGT→AAT              | (-124) G→A |
| 59T | none             | codon 139 AAG→ACG              | none       |
| 60T | none             | codon 157 GTC→GCC              | (-124) G→A |
| 61T | none             | none                           | none       |
| 62T | none             | intron 4 tcctacagTA→ccctacagTA | (-124) G→A |
| 63T | none             | codon 244 GGC→TGC              | (-124) G→A |
| 64T | none             | codon 156 CGC→CAC              | none       |
| 65T | none             | codon 240 AGT→CGT              | (-124) G→A |
| 66T | none             | none                           | none       |
| 67T | none             | none                           | (-124) G→A |
| 68T | codon34 GGA→AGA  | none                           | (-127) G→A |
| 69T | none             | none                           | (-124) G→A |
| 70T | none             | none                           | none       |
| 71T | none             | none                           | none       |
| 72T | none             | none                           | none       |
| 73T | none             | codon 258 GAA→AAA              | none       |
| 74T | codon34 GGA→GTA  | none                           | none       |
| 75T | none             | none                           | none       |
| 76T | codon45 TCT→TTT  | codon 285 GAG→AAG              | none       |
| 77T | none             | codon 236 TAC→TGC              | (-124) G→A |
| 78T | none             | none                           | (-124) G→A |

|      |                           |                   |                      |
|------|---------------------------|-------------------|----------------------|
| 79T  | none                      | none              | (-124) G→A           |
| 80T  | none                      | none              | (-124) G→A           |
| 81T  | none                      | none              | none                 |
| 82T  | none                      | none              | none                 |
| 83T  | none                      | none              | (-124) G→A           |
| 84T  | codon 44 to 55 del (33bp) | none              | (-124) G→A (-68) G→A |
| 85T  | codon 37 TCT→TTT          | none              | (-124) G→A           |
| 86T  | codon 45 TCT→CCT          | none              | (-124) G→A           |
| 87T  | none                      | none              | (-124) G→A           |
| 88T  | none                      | none              | (-124) G→A           |
| 89T  | codon 41 ACC→GCC          | none              | (-124) G→A           |
| 90T  | codon 41 ACC→GCC          | none              | (-124) G→A           |
| 91T  | none                      | none              | (-124) G→A           |
| 92T  | codon 45 TCT→CCT          | none              | none                 |
| 93T  | none                      | none              | none                 |
| 94T  | none                      | none              | (-124) G→A           |
| 95T  | codon 41 ACC→GCC          | codon 239 AAC→GAC | (-124) G→A           |
| 96T  | codon 41 ACC→GCC          | none              | (-124) G→A           |
| 97T  | none                      | none              | (-124) G→A           |
| 98T  | none                      | none              | none                 |
| 99T  | codon36 CAT→CCT           | none              | (-124) G→A           |
| 100T | none                      | none              | none                 |
| 101T | none                      | none              | none                 |
| 102T | none                      | none              | (-124) G→A           |
| 103T | none                      | none              | (-124) G→A           |
| 104T | none                      | none              | none                 |
| 105T | none                      | none              | (-124) G→A           |
| 106T | none                      | none              | (-124) G→A           |
| 107T | none                      | none              | (-124) G→A           |
| 108T | none                      | none              | (-124) G→A           |
| 109T | codon 32 GAC→AAC          | none              | (-124) G→A           |
| 110T | codon 45 TCT→CCT          | none              | none                 |
| 111T | none                      | none              | (-124) G→A           |
| 112T | none                      | none              | none                 |
| 113T | codon 41 ACC→GCC          | none              | (-124) G→A           |
| 114T | none                      | none              | (-124) G→A           |
| 115T | none                      | none              | (-124) G→A           |
| 116T | none                      | none              | (-124) G→A           |
| 117T | none                      | codon 270 TTT→GTT | none                 |
| 118T | none                      | none              | (-124) G→A           |
| 119T | none                      | none              | none                 |
| 120T | none                      | none              | (-124) G→A           |
| 121T | none                      | none              | (-124) G→A           |
| 122T | none                      | none              | none                 |
| 123T | none                      | none              | none                 |
| 124T | none                      | none              | (-124) G→A           |
| 125T | none                      | none              | none                 |

**Table S2.** The details of the clinical background of 25 patients who underwent liver transplantation.

| Clinical Factors                 | Median (25th–75th Percentile) or Number of Cases |
|----------------------------------|--------------------------------------------------|
| Age (years old)                  | 59 (54–62.5)                                     |
| Sex                              |                                                  |
| Male/female                      | 19/6                                             |
| Virus                            |                                                  |
| HBV/HCV/HBV& HCV/negative        | 10/13/1/1                                        |
| Serum AFP <sup>1)</sup> (ng/mL)  | 41 (9.4–222)                                     |
| Serum DCP <sup>2)</sup> (mAU/mL) | 54 (16.8–151.5)                                  |
| Maximum tumor size (cm)          | 2.6 (1.8–3.2)                                    |
| Number of tumor                  |                                                  |
| Single/multiple/missing          | 3/22                                             |
| Tumor differentiation            |                                                  |
| Well/moderately/poorly/missing   | 3/17/5                                           |

<sup>1)</sup> AFP;  $\alpha$ -fetoprotein <sup>2)</sup> Des-gamma carboxyprothrombin.

**Table S3.** Mutations detected in HCCs from liver transplantation.

| Sample ID | CNTTB1                    | TP53               | TERT promoter |
|-----------|---------------------------|--------------------|---------------|
| T03H      | none                      | none               | (-124) G→A    |
| T04H      | none                      | none               | none          |
| T05H      | codon 41 ACC→GCC          | codon 183 TCA→CCA  | none          |
| T10H      | none                      | codon 181 CGC→TGC  | (-124) G→A    |
| T15H12    | none                      | none               | (-124) G→A    |
| T21H1     | none                      | codon 237 ATG→ATA  | (-124) G→A    |
| T22H      | codon 45 TCT→CCT          | none               | (-124) G→A    |
| T26H1     | none                      | codon 286 GAA→TAA  | none          |
| T29H      | none                      | codon 234 TAC→TAA  | (-124) G→A    |
| T32H      | none                      | none               | (-124) G→A    |
| T35H1     | none                      | none               | (-124) G→A    |
| T38H1     | none                      | none               | none          |
| T42H      | none                      | none               | (-124) G→A    |
| T43H      | none                      | none               | none          |
| T47H      | codon 45 to 47 del (9 bp) | none               | (-124) G→A    |
| T51H      | codon 32 GAC→GGC          | none               | (-124) G→A    |
| T52H2     | none                      | none               | none          |
| T53H      | none                      | none               | (-124) G→A    |
| T55H      | none                      | codon 239 AAC→GAC  | (-124) G→A    |
| T57H1     | codon 45 TCT→TTT          | codon 248 CGG→TGG  | (-124) G→A    |
| T61H4     | codon 32 GAC→GGC          | none               | (-124) G→A    |
| T77H1     | none                      | none               | (-124) G→A    |
| T78H1     | none                      | codon 173 GTG→ATG  | none          |
| T86H1     | none                      | intron 5 TGgt→TGgc | (-124) G→A    |
| T95H2     | codon 41 ACC→GCC          | none               | (-124) G→A    |

**Table S4.** Factors associated with disease-free survival of HCC patients who underwent liver transplantation.

| Clinicopathological backgrounds | No. of Cases |            | Univariate     | Multivariate   |                  |
|---------------------------------|--------------|------------|----------------|----------------|------------------|
|                                 | Total        | With Event | <i>p</i> value | <i>p</i> value | HR (95% CI)      |
| AFP                             |              |            |                |                |                  |
| ≥200 ng/mL                      | 6            | 5          | <0.0001        | 0.0969         | 14.8 (0.64–1413) |
| <200 ng/mL                      | 18           | 1          |                |                | 1                |
| PIVKA-II                        |              |            |                |                |                  |
| ≥400 AU/mL                      | 3            | 3          | 0.0003         | 0.5050         | 2.01 (0.27–22.6) |
| <400 AU/mL                      | 21           | 3          |                |                | 1                |
| Size                            |              |            |                |                |                  |
| ≥3.0 cm                         | 9            | 5          | 0.0170         | 0.9617         | 0.93 (0.04–31.0) |
| <3.0 cm                         | 16           | 1          |                |                |                  |
| Differentiation                 |              |            |                |                |                  |
| Mod-poor                        | 22           | 6          | 0.3325         |                |                  |
| Well                            | 3            | 0          |                |                |                  |
| Number of tumor                 |              |            |                |                |                  |
| Multiple                        | 22           | 6          | 0.3325         |                |                  |
| Single                          | 3            | 0          |                |                |                  |
| Milan criteria                  |              |            |                |                |                  |
| Out                             | 17           | 6          | 0.1782         |                |                  |
| In                              | 8            | 0          |                |                |                  |
| Molecular pattern               |              |            |                |                |                  |
| Aggressive                      | 10           | 5          | 0.0090         | 0.8200         | 1.42 (0.07–44.0) |
| Mild                            | 14           | 1          |                |                |                  |

supplementary S5 in an individual.

**Table S6.** The details of the clinical background of 125 patients who underwent hepatectomy.

| Clinical Factors                | Median (25th–75th Percentile) or Number of Cases |
|---------------------------------|--------------------------------------------------|
| Age (years old)                 | 63 (56–69)                                       |
| Sex (male/female)               | 90/35                                            |
| Virus                           |                                                  |
| HBV/HCV/HBV& HCV/negative       | 27/75/2/21                                       |
| Serum AFP <sup>1)</sup> (ng/mL) | 55 (7.3–487.5)                                   |
| Maximum tumor size (cm)         | 3.6 (2.7–6)                                      |
| Vascular invasion               |                                                  |
| Presence/absence/missing        | 58/65/2                                          |
| Number of tumor                 |                                                  |
| Single/multiple/missing         | 55/58/12                                         |
| Tumor differentiation           |                                                  |
| Well/moderately/poorly/missing  | 36/64/21/4                                       |

<sup>1)</sup> AFP;  $\alpha$  fetoprotein.

**Table S7.** The details of PCR primers and conditions for mutational analyses.

| Target genes         | Primers                                                                        | T <sub>m</sub> |
|----------------------|--------------------------------------------------------------------------------|----------------|
| <i>CNTTB1</i> exon 3 | Forward: 5'-(ATGGAACCAGACAGAAAAG)-3'<br>Reverse: 5'-(TACAGGACTTGGGAGGTATC)-3'  | 58 °C          |
| <i>TP53</i> exon 5-1 | Forward: 5'-(TTATCTGTTCACCTGTGCCC)-3'<br>Reverse: 5'-(TCATGTGCTGTGACTGCTTG)-3' | 60 °C          |
| <i>TP53</i> exon 5-2 | Forward: 5'-(TTCCACACCCCGCCCGGCA)-3'<br>Reverse: 5'-(ACCCTGGGCAACCAGCCCTG)-3'  | 65 °C          |
| <i>TP53</i> exon 6   | Forward: 5'-(ACGACAGGGCTGGTTGCCCA)-3'<br>Reverse: 5'-(CTCCCAGAGACCCAGTTGC)-3'  | 65 °C          |
| <i>TP53</i> exon 7   | Forward: 5'-(GGCCTCATCTTGGGCCTGTG)-3'<br>Reverse: 5'-(CAGTGTGCAGGGTGGCAAGT)-3' | 64 °C          |
| <i>TP53</i> exon 8   | Forward: 5'-(CTGCCTCTTGCTTCTCTTT)-3'<br>Reverse: 5'-(TCTCCTCCACCGCTTCTTGT)-3'  | 60 °C          |
| <i>TERT</i> promoter | Forward: 5'-(CAGCGCTGCCTGAAACTC)-3'<br>Reverse: 5'-(GTCCTGCCCCCTTCACCTT)-3'    | 62 °C          |

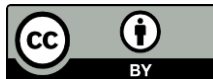

© 2018 by the authors. Licensee MDPI, Basel, Switzerland. This article is an open access article distributed under the terms and conditions of the Creative Commons Attribution (CC BY) license (<http://creativecommons.org/licenses/by/4.0/>).
